# Supplementary material
Source: PubMed Central journal article supplement (PMC10010395)
Supplement: ehp10710.s001.acco.pdf [file ehp10710.s001.acco.pdf]

**Note to readers with disabilities:** *EHP* strives to ensure that all journal content is accessible to all readers. However, some figures and Supplemental Material published in *EHP* articles may not conform to [508 standards](#) due to the complexity of the information being presented. If you need assistance accessing journal content, please contact [ehp508@niehs.nih.gov](mailto:ehp508@niehs.nih.gov). Our staff will work with you to assess and meet your accessibility needs within 3 working days.

### **Supplemental Material**

#### **Association of Combined Exposure to Ambient Air Pollutants, Genetic Risk, and Incident Rheumatoid Arthritis: A Prospective Cohort Study in the UK Biobank**

Jie Zhang, Xin-Yu Fang, Jun Wu, Yin-Guang Fan, Rui-Xue Leng, Bo Liu, Xiao-Jie Lv, Yu-Lu Yan, Chen Mao, and Dong-Qing Ye

#### **Table of Contents**

**Table S1.** Source and corresponding code to identify rheumatoid arthritis cases and relevant prescription medication in the UK Biobank study.

**Table S2.** Components of healthy diet score and alcohol consumption in the UK Biobank study.

**Table S3.** A comparison of baseline characteristics between the current study population (342,973 participants) and the full UK Biobank cohort (502,505 participants).

**Table S4.** Spearman correlations between the individual air pollutant incorporated in the air pollution score.

**Table S5.** Weights of each air pollutant included in the calculation of air pollution score in the main analysis.

**Table S6.** Comparison of contribution proportion of individual air pollutant to total effect among weighted air pollution score, quantile g-computation, and Bayesian kernel machine regression in the sensitivity analysis.

**Table S7.** Comparison of the total effect of the mixture of air pollutants among weighted air pollution score, quantile g-computation, and Bayesian kernel machine regression in the sensitivity analysis.

**Table S8.** Association between air pollution score and RA risk in different subgroups, and interaction analysis, according to age, sex, education level, smoking status, and rheumatoid factor status.

**Table S9.** Association between air pollution score (eliminating PM<sub>2.5-10</sub> and PM<sub>10</sub>) and incident rheumatoid arthritis among UK Biobank 342,973 participants (2,034 incident RA events) in the sensitivity analysis.

**Table S10.** Association between air pollution score (including PM<sub>2.5</sub> absorbance) and incident rheumatoid arthritis among UK Biobank 342,973 participants (2,034 incident RA events) in the sensitivity analysis.

**Table S11.** Association between air pollution score and incident rheumatoid arthritis among UK Biobank 342,691 participants (1,752 incident RA events), after excluding participants with a follow-up time of fewer than 2 years in the sensitivity analysis.

**Table S12.** Association between air pollution score and incident rheumatoid arthritis among UK Biobank 342,973 participants (2,034 incident RA events), additionally adjusted the latitude of participants' residence in the sensitivity analysis.

**Table S13.** Association between air pollution score and incident rheumatoid arthritis among UK Biobank 292,987 participants (1,745 incident RA events), after limiting participants living in the current address for at least five years in the sensitivity analysis.

**Table S14.** Association between air pollution score and incident rheumatoid arthritis among UK Biobank 313,466 participants (1,701 incident RA events), after excluding participants who used NSAIDs previously or at baseline in the sensitivity analysis.

**Figure S1.** Overview of design and population selection in the UK Biobank study of the association of air pollution and genetic risk with rheumatoid arthritis incidence.

**Figure S2.** Exposure-response relationships of each air pollutant with incident rheumatoid arthritis among UK Biobank 342,973 participants (2,034 incident RA events).

**Figure S3.** Joint distribution of air pollution scores and polygenic risk scores between RA and non-RA among UK Biobank 342,973 participants (2,034 incident RA events).

**Figure S4.** Validation of association between air pollution score and incident rheumatoid arthritis by 10-fold cross-validation.

**Figure S5.** Exposure-response relationship of air pollution score with incident rheumatoid arthritis according to age.

**Figure S6.** Exposure-response relationship of air pollution score with incident rheumatoid arthritis according to sex.

**Figure S7.** Exposure-response relationship of air pollution score with incident rheumatoid arthritis according to smoking status.

**Figure S8.** Exposure-response relationship of air pollution score with incident rheumatoid arthritis according to education level.

**Figure S9.** Exposure-response relationship of air pollution score with rheumatoid arthritis incidence according to rheumatoid factor (RF) status.

**Additional File-** Excel Document

**Supplemental Table S1** Source and corresponding code to identify rheumatoid arthritis cases and relevant prescription medication in the UK Biobank study.

| Source                                                                                                                                                                                                                                                                                                                                                                                                                                                                                                                                                                                                                                                                                                                                                                                                                                                                                                                                                                                                                                                                                                                                                                                                                                                                                                                                                                                                                            | UK Biobank data fields                                          | Corresponding code                                                                                                                                                                                                                                                                                                                                                                                                                                                                                                                                                                                                                                                                                                                                                                                                                                                                                                                                                                                                                                                                                                                                                                                                                                                          |
|-----------------------------------------------------------------------------------------------------------------------------------------------------------------------------------------------------------------------------------------------------------------------------------------------------------------------------------------------------------------------------------------------------------------------------------------------------------------------------------------------------------------------------------------------------------------------------------------------------------------------------------------------------------------------------------------------------------------------------------------------------------------------------------------------------------------------------------------------------------------------------------------------------------------------------------------------------------------------------------------------------------------------------------------------------------------------------------------------------------------------------------------------------------------------------------------------------------------------------------------------------------------------------------------------------------------------------------------------------------------------------------------------------------------------------------|-----------------------------------------------------------------|-----------------------------------------------------------------------------------------------------------------------------------------------------------------------------------------------------------------------------------------------------------------------------------------------------------------------------------------------------------------------------------------------------------------------------------------------------------------------------------------------------------------------------------------------------------------------------------------------------------------------------------------------------------------------------------------------------------------------------------------------------------------------------------------------------------------------------------------------------------------------------------------------------------------------------------------------------------------------------------------------------------------------------------------------------------------------------------------------------------------------------------------------------------------------------------------------------------------------------------------------------------------------------|
| <p><b>Hospital inpatient data</b><br/>RA diagnoses of ICD-10, ICD-9</p>                                                                                                                                                                                                                                                                                                                                                                                                                                                                                                                                                                                                                                                                                                                                                                                                                                                                                                                                                                                                                                                                                                                                                                                                                                                                                                                                                           | <p>41720: "Diagnoses - ICD10"<br/>41271: "Diagnoses - ICD9"</p> | <p>ICD-9: 71400, 71401, 71403, 71404, 71405, 71406, 71409<br/>ICD-10: M05.0, M05.1, M05.2, M05.3, M05.8, M05.9, M06.0, M06.1, M06.2, M06.3, M06.4, M06.9</p>                                                                                                                                                                                                                                                                                                                                                                                                                                                                                                                                                                                                                                                                                                                                                                                                                                                                                                                                                                                                                                                                                                                |
| <p><b>Medical conditions</b><br/>self-report past and current RA through a verbal interview by a trained nurse.</p>                                                                                                                                                                                                                                                                                                                                                                                                                                                                                                                                                                                                                                                                                                                                                                                                                                                                                                                                                                                                                                                                                                                                                                                                                                                                                                               | <p>20002: "Non-cancer illness code, self-reported"</p>          | <p>1464</p>                                                                                                                                                                                                                                                                                                                                                                                                                                                                                                                                                                                                                                                                                                                                                                                                                                                                                                                                                                                                                                                                                                                                                                                                                                                                 |
| <p><b>Prescription medication</b><br/>self-report past and current medicine are taken through a interview by a trained nurse, including the following medicine:</p> <p>(1) Steroids: corticosteroids, depomedrone, triamcinolone, methylprednisolone, prednisolone, prednisone (also listed in UK Biobank as Deltacortril enteric; Deltastab; Precortisyl; Prednesola)</p> <p>(2) Synthetic disease-modifying anti-rheumatic drugs (DMARDs): Auranofin (also listed in UK Biobank as Ridaura), Azathioprine (also listed in UK Biobank as Imuran), hydroxychloroquine (also listed in UK Biobank as Plaquenil), leflunomide (also listed in UK Biobank as Arava), methotrexate, methotrexate injections, myocrisin, penicillamine, sulfasalazine (also listed in UK Biobank as Sulazine; salazopyrin; sulphasalazine)</p> <p>(3) Biologic DMARDs: abatacept, adalimumab (also listed in UK Biobank as Humira injection solution), certolizumab, etanercept, golimumab, infliximab, rituximab, tocilizumab</p> <p>(4) Nonsteroidal anti-inflammatory drugs (NSAIDs): Indomethacin, Sulindac, Diclofenac, Etodolac, Acemetacin, Ketorolac, Aceclofenac, Diclofenac/Misoprostol, Piroxicam, Tenoxicam, Meloxicam, Ibuprofen, Naproxen, Ketoprofen, Flurbiprofen, Tiaprofenic Acid, Ibuprofen/Menthol, Naproxen/Misoprostol, Mefenamic Acid, Tolfenamic Acid, Celecoxib, Etoricoxib, Nabumetone, Glucosamine, Chondroitin Sulfate</p> | <p>20003: "Treatment/medication code"</p>                       | <p>Steroids, Synthetic DMARDs, and Biologic DMARDs:<br/>1140874936,1140874940,1140874944,1140874950,1140874954,1140874956,1140874978,1140868426,1140883058,1140883060,1140883062,1140883064,1140874976,1140800000,1140874930,1140868364,1140868370,1140874936,1140874940,1140875316,1140874944,1140874950,1140875400,1140875404,1140909864,1140869930,1141145996,1140884308,1140875392,1141166294,1141166302,1141166304,1141166306,1140910036,1140869848,1140853054,1140853056,1140875304,1140875306,1140875308,1140909702,1141188900, 1140865670,1140865668,1141188588,1141188594</p> <p>NSAIDs:<br/>1140871354,1140871604,1140921828,11408711681140917394,1140871180,1140923920,1140909354,1140877872,1141182674,1140871174,11411674261,140877874,1140871188,1140871196,1141193170,1140875278,1140884558,1140925806,1140871266,1140927086,1140878036,1140871672,1141169530,1140871666,1140875346,1140926732,1140926796,1140926794,1141187776,1140871388,1141153134,1140871472,1140871522,1140871506,1140871238,1140871236,1140871616,1140911748,1140871638,1140881612,1140871542,1140871546,1140928840,1141176668,1141176670,1141180140,1141180148,1141180150,1141180152,1140875336,1140875338,1141188442,1187,1140871666,1140875346,1140926732,1140926796,1140926794</p> |

**Supplemental Table S2** Components of healthy diet score and alcohol consumption in the UK Biobank study.

| Factors             | Source and definition                                                                                                                                                                                                                                                                                                                                                                                                                                                                                                                                                                                                                                                                                                                              | UK Biobank data fields                                                                                                                                                                                                                                                                                                                                                                                                                                                                                                                                                                                                                                                                                                                                                                                                                                                                                                               |
|---------------------|----------------------------------------------------------------------------------------------------------------------------------------------------------------------------------------------------------------------------------------------------------------------------------------------------------------------------------------------------------------------------------------------------------------------------------------------------------------------------------------------------------------------------------------------------------------------------------------------------------------------------------------------------------------------------------------------------------------------------------------------------|--------------------------------------------------------------------------------------------------------------------------------------------------------------------------------------------------------------------------------------------------------------------------------------------------------------------------------------------------------------------------------------------------------------------------------------------------------------------------------------------------------------------------------------------------------------------------------------------------------------------------------------------------------------------------------------------------------------------------------------------------------------------------------------------------------------------------------------------------------------------------------------------------------------------------------------|
| Healthy diet score  | <p>UK Biobank Food Frequency Questionnaire at baseline:<br/>                     A healthy diet score was adapted from the American Heart Association Guidelines.<sup>1</sup><br/>                     Each healthy dietary component counts as one point of a healthy diet score:</p> <ol style="list-style-type: none"> <li>1. Vegetable intake <math>\geq</math> 4 tablespoons/day</li> <li>2. Fruit intake <math>\geq</math> 3 pieces/day</li> <li>3. Fish intake <math>\geq</math> twice/week</li> <li>4. Processed meats <math>\leq</math> twice/week</li> <li>5. Unprocessed red meats <math>\leq</math> twice/week</li> </ol>                                                                                                              | <p>1289: "Cooked vegetable intake"<br/>                     1299: "Salad / raw vegetable intake"<br/>                     1309: "Fresh fruit intake"<br/>                     1319: "Dried fruit intake"<br/>                     1329: "Oily fish intake"<br/>                     1339: "Non-oily fish intake"<br/>                     1349: "Processed meat intake"<br/>                     1359: "Poultry intake"<br/>                     1369: "Beef intake"<br/>                     1379: "Lamb/mutton intake"<br/>                     1389: "Pork intake"</p>                                                                                                                                                                                                                                                                                                                                                            |
| Alcohol consumption | <p>UK Biobank Touchscreen questionnaire at baseline;<br/>                     Conversion of self-reported alcohol intake to standard drink of alcohol per day, <sup>1</sup> standard drink=8 g. To compute the standard drink of alcohol per day: for each source of alcohol, multiply by the given factor and divide by 7 (if the input is weekly intake) or 30 (if the input is monthly intake) to get the standard drink/day.<sup>2</sup></p> <p>Given the factor of each source of alcohol:</p> <p>Red wine:1.5<br/>                     Champagne/White wine:1.5<br/>                     Beer/Cider:2.5<br/>                     Spirits:1<br/>                     Fortified wine:1<br/>                     Other alcoholic drinks:1.5</p> | <p>220117: "Alcohol drinker status"<br/>                     1558: "Alcohol intake frequency"<br/>                     1568: "Average weekly red wine intake"<br/>                     1578: "Average weekly champagne plus white wine intake"<br/>                     1588: "Average weekly beer plus cider intake"<br/>                     1608: "Average weekly fortified wine intake"<br/>                     5364: "Average weekly intake of other alcoholic drinks"<br/>                     4407: "Average monthly red wine intake"<br/>                     4418: "Average monthly champagne plus white wine intake"<br/>                     4429: "Average monthly beer plus cider intake"<br/>                     4440: "Average monthly spirits intake"<br/>                     4451: "Average monthly fortified wine intake"<br/>                     4462: "Average monthly intake of other alcoholic drinks"</p> |

1. Lloyd-Jones DM, Hong Y, Labarthe D, Mozaffarian D, Appel LJ, Van Horn L, Greenlund K, Daniels S, Nichol G, Tomaselli GF, Arnett DK, Fonarow GC, Ho PM, Lauer MS, Masoudi FA, Robertson RM, Roger V, Schwamm LH, Sorlie P, Yancy CW, Rosamond WD; American Heart Association Strategic Planning Task Force and Statistics Committee. Defining and setting national goals for cardiovascular health promotion and disease reduction: the American Heart Association's strategic Impact Goal through 2020 and beyond. *Circulation*. 2010 Feb 2;121(4):586-613. doi: 10.1161/CIRCULATIONAHA.109.192703.

2. Kalinowski A, Humphreys K. Governmental standard drink definitions and low-risk alcohol consumption guidelines in 37 countries. *Addiction*. 2016 Jul;111(7):1293-8. doi: 10.1111/add.13341. Epub 2016 Apr 13.

**Supplemental Table S3** A comparison of baseline characteristics between the current study population (342,973 participants) and the full UK Biobank cohort (502,505 participants).

| Characteristics <sup>a</sup>                             | Study population<br>( <i>n</i> = 342,973) | UK Biobank population <sup>b</sup><br>( <i>n</i> = 502,505) |
|----------------------------------------------------------|-------------------------------------------|-------------------------------------------------------------|
| Age (years)                                              | 56.99 (7.93)                              | 56.53 (8.10)                                                |
| Follow-up time (years), (median, IQR)                    | 8.1 (1.2)                                 |                                                             |
| Sex ( <i>n</i> , %)                                      |                                           |                                                             |
| female                                                   | 183,218 (53.42)                           | 273,382 (54.40)                                             |
| male                                                     | 159,755 (46.58)                           | 229,123 (45.60)                                             |
| household income (£)                                     |                                           |                                                             |
| less than 18,000                                         | 76,921 (22.43)                            | 97,198 (19.34)                                              |
| 18,000 to 29,999                                         | 89,325 (26.04)                            | 108,177 (21.53)                                             |
| 30,000 to 51,999                                         | 90,327 (26.34)                            | 110,772 (22.04)                                             |
| 52,000 to 100,000                                        | 68,873 (20.08)                            | 86,266 (17.16)                                              |
| greater than 100,000                                     | 17,527(5.11)                              | 22,929(4.56)                                                |
| Education ( <i>n</i> , %)                                |                                           |                                                             |
| college or university degree                             | 122,157 (35.62)                           | 161,163 (32.07)                                             |
| other                                                    | 220,816 (64.38)                           | 341,342 (48.94)                                             |
| Smoking status ( <i>n</i> , %)                           |                                           |                                                             |
| never smoking                                            | 187,258 (54.60)                           | 273,522 (54.43)                                             |
| previous smoking                                         | 121,670 (35.48)                           | 173,056 (34.44)                                             |
| current smoking                                          | 34,045 (9.93)                             | 52,978 (10.54)                                              |
| Alcohol consumption (standard-drink/day <sup>c</sup> )   | 2.03 (2.44)                               | 1.93 (2.44)                                                 |
| Healthy diet score ( <i>n</i> , %)                       |                                           |                                                             |
| 0-1                                                      | 77,980 (22.74)                            | 94,431 (18.79)                                              |
| 2-3                                                      | 185,559 (54.10)                           | 223,542 (44.49)                                             |
| 4-5                                                      | 79,434 (23.16)                            | 98,408 (19.58)                                              |
| Sedentary time (hours/day)                               | 4.87 (2.38)                               | 4.85 (2.45)                                                 |
| Physical activity (mins/day)                             | 128.80 (102.82)                           | 127.09 (101.90)                                             |
| Body mass index (kg/m <sup>2</sup> )                     | 27.42 (4.75)                              | 27.42 (4.75)                                                |
| Rheumatoid factor (RF) status ( <i>n</i> , %)            |                                           |                                                             |
| RF-positive                                              | 12,220 (3.56)                             | 18,713 (3.72)                                               |
| RF-negative                                              | 314,100 (91.58)                           | 450,847 (89.71)                                             |
| PM <sub>2.5</sub> (µg/m <sup>3</sup> ), (median, IQR)    | 9.88 (1.26)                               | 9.93 (1.28)                                                 |
| PM <sub>2.5-10</sub> (µg/m <sup>3</sup> ), (median, IQR) | 6.08 (0.76)                               | 6.11 (0.80)                                                 |
| PM <sub>10</sub> (µg/m <sup>3</sup> ), (median, IQR)     | 38.01 (4.44)                              | 38.31 (4.67)                                                |
| NO <sub>2</sub> (µg/m <sup>3</sup> ), (median, IQR)      | 27.30 (10.22)                             | 27.93 (10.73)                                               |
| NO <sub>x</sub> (µg/m <sup>3</sup> ), (median, IQR)      | 41.27 (16.10)                             | 42.43 (16.38)                                               |
| Air pollution score                                      | 70.63 (11.13)                             |                                                             |

Abbreviation: PM<sub>2.5</sub>, particulate matter with aerodynamic diameter < 2.5 mm; PM<sub>10</sub>, particulate matter with an aerodynamic diameter < 10 mm; PM<sub>2.5-10</sub>, particulate matter with an aerodynamic diameter between 2.5 and 10 mm; NO<sub>2</sub>, nitrogen dioxide; NO<sub>x</sub>, nitrogen oxides. IQR, interquartile range.

<sup>a</sup>Data are mean ± standard deviation (SD) unless otherwise indicated. Missing values for each characteristic: household income (*n* = 48,144), education (*n* = 62,218), smoking status (*n* = 1,182), alcohol consumption (*n* = 2,848), healthy diet score (*n* = 56,104), sedentary time (*n* = 8,334), physical activity (*n* = 65,263), body mass index (*n* = 1,079), rheumatoid factor (*n* = 16,653)

<sup>b</sup>Follow-up time and air pollution score were only available in the study population. And the sum of proportion and less than 100% of each characteristic due to missing values were not imputed in UK Biobank population.

<sup>c</sup>A standard-drink of alcohol consumption = 8 g of pure alcohol intake.

**Supplemental Table S4** Spearman correlations between the individual air pollutant incorporated in the air pollution score.

|                                           | NO <sub>2</sub> (µg/m <sup>3</sup> ) | NO <sub>x</sub> (µg/m <sup>3</sup> ) | PM <sub>2.5</sub> (µg/m <sup>3</sup> ) | PM <sub>2.5-10</sub> (µg/m <sup>3</sup> ) | PM <sub>10</sub> (µg/m <sup>3</sup> ) |
|-------------------------------------------|--------------------------------------|--------------------------------------|----------------------------------------|-------------------------------------------|---------------------------------------|
| NO <sub>2</sub> (µg/m <sup>3</sup> )      | 1                                    |                                      |                                        |                                           |                                       |
| NO <sub>x</sub> (µg/m <sup>3</sup> )      | 0.80*                                | 1                                    |                                        |                                           |                                       |
| PM <sub>2.5</sub> (µg/m <sup>3</sup> )    | 0.75*                                | 0.87*                                | 1                                      |                                           |                                       |
| PM <sub>2.5-10</sub> (µg/m <sup>3</sup> ) | 0.23*                                | 0.26*                                | 0.25*                                  | 1                                         |                                       |
| PM <sub>10</sub> (µg/m <sup>3</sup> )     | 0.72*                                | 0.64*                                | 0.62*                                  | 0.54*                                     | 1                                     |

\*Indicates  $P < 0.001$ **Supplemental Table S5** Weights of each air pollutant included in the calculation of air pollution score in the main analysis.

| Air pollutants(µg/m <sup>3</sup> ) | β-weights in the air pollution score <sup>a</sup> | SD        |
|------------------------------------|---------------------------------------------------|-----------|
| PM <sub>2.5</sub>                  | 0.0527914                                         | 0.0212967 |
| PM <sub>2.5-10</sub>               | -0.0009232                                        | 0.02468   |
| PM <sub>10</sub>                   | 0.002401                                          | 0.006354  |
| NO <sub>2</sub>                    | 0.002948                                          | 0.00278   |
| NO <sub>x</sub>                    | 0.0040157                                         | 0.001425  |

NO<sub>x</sub>, nitric oxide; NO<sub>2</sub>, nitrogen dioxide; PM<sub>2.5</sub>, particulate matter with aerodynamic diameter ≤2.5 µm; PM<sub>2.5-10</sub>, particulate matter with aerodynamic diameter 2.5-10 µm; PM<sub>10</sub>, particulate matter with aerodynamic diameter ≤10 µm. <sup>a</sup>Adjusted for age, sex, UK Biobank assessment center, household income education, smoking status, body mass index, alcohol consumption, sedentary time, physical activity duration, and healthy diet score.

**Supplemental Table S6** Comparison of contribution proportion of individual air pollutant to total effect among weighted air pollution score, quantile g-computation, and Bayesian kernel machine regression in the sensitivity analysis.

| Individual air pollutants<br>( $\mu\text{g}/\text{m}^3$ ) | Weighted air pollution score |                  | Quantile g-computation     |                                                    | Bayesian kernel machine regression |                        |
|-----------------------------------------------------------|------------------------------|------------------|----------------------------|----------------------------------------------------|------------------------------------|------------------------|
|                                                           | $\beta^a$                    | <i>P</i> -values | Scaled effect <sup>b</sup> | Weight percent and Direction                       | Conditional PIP                    | Group PIP <sup>c</sup> |
| PM <sub>2.5</sub>                                         | 0.05                         | 0.013            | 0.026852                   | 19.6% in the sum of positive coefficients (0.137)  | 0.77                               |                        |
| PM <sub>10</sub>                                          | 0.0024                       | 0.7              | -0.0585                    | 100% in the sum of negative coefficients (-0.0585) | 0.05                               | 0.67                   |
| PM <sub>2.5-10</sub>                                      | -0.0009                      | 0.97             | 0.019865                   | 14.5% in the sum of positive coefficients (0.137)  | 0.12                               |                        |
| NO <sub>2</sub>                                           | 0.0029                       | 0.29             | 0.033428                   | 24.2% in the sum of positive coefficients (0.137)  | 0.13                               |                        |
| NO <sub>x</sub>                                           | 0.004                        | 0.0048           | 0.056855                   | 41.5% in the sum of positive coefficients (0.137)  | 0.94                               | 1                      |

NO<sub>x</sub>, nitric oxide; NO<sub>2</sub>, nitrogen dioxide; PM<sub>2.5</sub>, particulate matter with aerodynamic diameter  $\leq 2.5 \mu\text{m}$ ; PM<sub>2.5-10</sub>, particulate matter with aerodynamic diameter 2.5-10  $\mu\text{m}$ ; PM<sub>10</sub>, particulate matter with aerodynamic diameter  $\leq 10 \mu\text{m}$ . PIP, posterior inclusion probabilities

<sup>a</sup> log(HR) (95% CI in incident RA per  $\mu\text{g}/\text{m}^3$  increase in air pollutants

<sup>b</sup> log(HR) (95% CI) in incident RA per quartile increase in air pollutants

<sup>c</sup> Groups included particulate matters and nitrogen oxides.

All models were adjusted for age, sex, UK Biobank assessment center, household income education, smoking status, body mass index, alcohol consumption, sedentary time, physical activity duration, and healthy diet score.

**Supplemental Table S7** Comparison of the total effect of the mixture of air pollutants among weighted air pollution score, quantile g-computation, and Bayesian kernel machine regression in the sensitivity analysis.

| The mixture of air pollutants | Weighted air pollution score   | Quantile g-computation         | Bayesian kernel machine regression |
|-------------------------------|--------------------------------|--------------------------------|------------------------------------|
|                               | 1.06 (1.01, 1.10) <sup>a</sup> | 1.08 (1.02, 1.15) <sup>b</sup> |                                    |
| Quartile 1                    | Ref                            | Ref                            | Ref                                |
| Quartile 2                    | 1.00 (0.89, 1.14)              | 1.08 (1.02, 1.15)              | 1.05 (1.03, 1.08)                  |
| Quartile 3                    | 1.01 (0.89, 1.15)              | 1.17 (1.04, 1.31)              | 1.05 (1.03, 1.08)                  |
| Quartile 4                    | 1.14 (1.00, 1.29)              | 1.26 (1.06, 1.51)              | 1.41 (1.34, 1.49)                  |

<sup>a</sup> Hazard ratio (95% confidence interval) in incident RA per SD increase in air pollution score.

<sup>b</sup>  $\Psi$ ; HR (95% CI) in incident RA per quartile increase in all air pollutants

All models were adjusted for age, sex, UK Biobank assessment center, household income education, smoking status, body mass index, alcohol consumption, sedentary time, physical activity duration, and healthy diet score.

**Supplemental Table S8** Association between air pollution score and RA risk in different subgroups, and interaction analysis, according to age, sex, education level, smoking status, and rheumatoid factor status.

| Subgroup             | case / n        | HR (95% CI) <sup>a</sup> | Multiplicative interaction |         | Additive interaction |         |
|----------------------|-----------------|--------------------------|----------------------------|---------|----------------------|---------|
|                      |                 |                          | HR (95% CI) <sup>b</sup>   | P-value | RERI (95% CI)        | P-value |
| Age                  |                 |                          | 1.13 (1.02, 1.27)          | 0.044   | 0.04 (-0.20, 0.27)   | 0.38    |
| ≥65                  | 625 / 68,253    | 1.09 (1.01, 1.18)        |                            |         |                      |         |
| <65                  | 1,409 / 274,720 | 1.02 (0.97, 1.07)        |                            |         |                      |         |
| Sex                  |                 |                          | 1.43 (1.16, 1.77)          | 0.005   | 0.58 (0.28, 0.87)    | 0.0009  |
| Women                | 1,368 / 183,218 | 1.10 (1.05, 1.16)        |                            |         |                      |         |
| Men                  | 666 / 159,755   | 0.97 (0.90, 1.05)        |                            |         |                      |         |
| Smoking status       |                 |                          | 0.98 (0.77, 1.13)          | 0.99    | -0.02 (-0.28, 0.23)  | 0.58    |
| Never                | 921 / 187,258   | 1.06 (0.99, 1.13)        |                            |         |                      |         |
| Previous/Current     | 1,113 / 155,715 | 1.06 (1.00, 1.12)        |                            |         |                      |         |
| Education            |                 |                          | 1.21 (0.96, 1.51)          | 0.14    | 0.23 (0.002, 0.46)   | 0.026   |
| University degree    | 542 / 122,157   | 1.02 (0.94, 1.11)        |                            |         |                      |         |
| No university degree | 1,492 / 220,816 | 1.07 (1.02, 1.13)        |                            |         |                      |         |
| RF-status            |                 |                          | 0.77 (0.65, 0.86)          | 0.007   | 0.62 (-0.82, 2.08)   | 0.2     |
| Positive             | 417 / 341,356   | 1.07 (0.97, 1.17)        |                            |         |                      |         |
| Negative             | 1,543 / 342,482 | 1.08 (1.02, 1.13)        |                            |         |                      |         |

HR (95% CI): Hazard ratio (95% confidence interval); RERI: relative excess risk due to interaction

<sup>a</sup>HR (95% CI) in incident RA per SD increase in air pollution score.

<sup>b</sup>HR (95% CI) for the product term included in the model were age ≥ 65 years, women, no university degree, previous/current smoking, RF positive and 4<sup>th</sup> quartile air pollution score.

All subgroups were adjusted for age, sex, UK Biobank assessment center, household income education, smoking status, body mass index, alcohol consumption, sedentary time, physical activity duration and healthy diet score. Menopausal status (yes or no) and hormone replacement therapy use (yes or no) were additionally adjusted in women.

**Supplemental Table S9** Association between air pollution score (eliminating PM<sub>2.5-10</sub> and PM<sub>10</sub>) and incident rheumatoid arthritis among UK Biobank 342,973 participants (2,034 incident RA events) in the sensitivity analysis

| Air pollution score <sup>a</sup> | case / n     | HR (95% CI) of incident RA |                      |                      | P for trend |
|----------------------------------|--------------|----------------------------|----------------------|----------------------|-------------|
|                                  |              | Model 1 <sup>b</sup>       | Model 2 <sup>c</sup> | Model 3 <sup>d</sup> |             |
| Per SD increment                 | -            | 1.12 (1.07, 1.17)          | 1.06 (1.01, 1.10)    | 1.06 (1.01, 1.11)    |             |
| Quartile 1                       | 455 / 85,743 | Ref                        | Ref                  | Ref                  | 0.000041    |
| Quartile 2                       | 487 / 85,743 | 1.08 (0.95, 1.23)          | 0.99 (0.87, 1.13)    | 0.99 (0.87, 1.13)    |             |
| Quartile 3                       | 514 / 85,743 | 1.17 (1.03, 1.33)          | 1.01 (0.89, 1.15)    | 1.01 (0.89, 1.15)    |             |
| Quartile 4                       | 578 / 85,744 | 1.34 (1.18, 1.51)          | 1.13 (1.00, 1.28)    | 1.13 (1.00, 1.28)    |             |

HR, hazard ratio; CI, confidence interval.

<sup>a</sup>Air pollution score ranges: quartile 1: (26.95, 34.83); quartile 2: (34.84, 38.69); quartile 3: (38.70, 42.48); quartile 4: (42.49, 118.04). Mean (SD) of the air pollution score is 39.11 (6.53)

<sup>b</sup>Adjusted for age and sex.

<sup>c</sup>Adjusted for age, sex, UK Biobank assessment center, household income education, smoking status, body mass index, alcohol consumption, sedentary time, physical activity duration and healthy diet score.

<sup>d</sup>Adjusted for age, sex, UK Biobank assessment center, household income education, smoking status, body mass index, alcohol consumption, sedentary time, physical activity duration, healthy diet score, polygenic risk score, first ten genetic principal components and genotyping batch.



**Supplemental Table S10** Association between air pollution score (including PM<sub>2.5</sub> absorbance) and incident rheumatoid arthritis among UK Biobank 342,973 participants (2,034 incident RA events) in the sensitivity analysis

| Exposure                                  | case / n     | HR (95% CI) of incident RA |                      |                      | P for trend |
|-------------------------------------------|--------------|----------------------------|----------------------|----------------------|-------------|
|                                           |              | Model 1 <sup>a</sup>       | Model 2 <sup>b</sup> | Model 3 <sup>c</sup> |             |
| PM <sub>2.5</sub> absorbance <sup>d</sup> |              |                            |                      |                      |             |
| Per IQR increment                         | -            | 1.06 (1.01, 1.11)          | 1.02 (0.97, 1.07)    | 1.02 (0.97, 1.07)    |             |
| Quartile 1                                | 467 / 85,434 | Ref                        | Ref                  | Ref                  | 0.10        |
| Quartile 2                                | 553 / 90,353 | 1.12 (0.99, 1.26)          | 1.04 (0.92, 1.17)    | 1.04 (0.91, 1.17)    |             |
| Quartile 3                                | 524 / 82,066 | 1.17 (1.03, 1.32)          | 1.05 (0.92, 1.19)    | 1.05 (0.92, 1.18)    |             |
| Quartile 4                                | 490 / 83,086 | 1.16 (1.02, 1.31)          | 1.03 (0.90, 1.17)    | 1.02 (0.90, 1.17)    |             |
| Air pollution score <sup>e</sup>          |              |                            |                      |                      |             |
| Per SD increment                          | -            | 1.11 (1.07, 1.16)          | 1.05 (1.01, 1.10)    | 1.05 (1.00, 1.10)    |             |
| Quartile 1                                | 459 / 85,744 | Ref                        | Ref                  | Ref                  | 0.00017     |
| Quartile 2                                | 488 / 85,743 | 1.07 (0.95, 1.22)          | 0.98 (0.87, 1.12)    | 1.00 (0.86, 1.12)    |             |
| Quartile 3                                | 518 / 85,742 | 1.17 (1.03, 1.32)          | 1.01 (0.89, 1.14)    | 1.00 (0.88, 1.14)    |             |
| Quartile 4                                | 569 / 85,744 | 1.31 (1.16, 1.48)          | 1.11 (0.98, 1.26)    | 1.11 (0.98, 1.26)    |             |

HR, hazard ratio; CI, confidence interval.

<sup>a</sup>Adjusted for age and sex.

<sup>b</sup>Adjusted for age, sex, UK Biobank assessment center, household income education, smoking status, body mass index, alcohol consumption, sedentary time, physical activity duration, and healthy diet score.

<sup>c</sup>Adjusted for age, sex, UK Biobank assessment center, household income education, smoking status, body mass index, alcohol consumption, sedentary time, physical activity duration, healthy diet score, polygenic risk score, first ten genetic principal components, and genotyping batch.

<sup>d</sup>PM<sub>2.5</sub> absorbance ranges: quartile 1: (0.83, 0.98) µg/m<sup>3</sup>, quartile 2: (0.99, 1.11) µg/m<sup>3</sup>, quartile 3: (1.12, 1.27) µg/m<sup>3</sup>, quartile 4: (1.28, 4.60) µg/m<sup>3</sup> and IQR is 0.29 µg/m<sup>3</sup>

<sup>e</sup>Air pollution score ranges: quartile 1: (25.27, 32.86); quartile 2: (32.87, 36.24); quartile 3: (36.25, 39.67); quartile 4: (39.68, 103.65). Mean (SD) of the air pollution score is 36.65 (5.77)

**Supplemental Table S11** Association between air pollution score and incident rheumatoid arthritis among UK Biobank 342,691 participants (1,752 incident RA events), after excluding participants with a follow-up time of fewer than 2 years in the sensitivity analysis.

| Air pollution score <sup>a</sup> | case / <i>n</i> | HR (95% CI) of incident RA |                      |                      | <i>P</i> for trend |
|----------------------------------|-----------------|----------------------------|----------------------|----------------------|--------------------|
|                                  |                 | Model 1 <sup>b</sup>       | Model 2 <sup>c</sup> | Model 3 <sup>e</sup> |                    |
| Per SD increment                 | -               | 1.11 (1.06, 1.16)          | 1.05 (1.00, 1.10)    | 1.05 (1.00, 1.10)    |                    |
| Quartile 1                       | 384 / 85,673    | Ref                        | Ref                  | Ref                  | 0.000091           |
| Quartile 2                       | 423 / 85,676    | 1.11 (0.97, 1.28)          | 1.03 (0.89, 1.18)    | 1.03 (0.89, 1.18)    |                    |
| Quartile 3                       | 451 / 85,680    | 1.22 (1.06, 1.39)          | 1.06 (0.92, 1.21)    | 1.06 (0.92, 1.21)    |                    |
| Quartile 4                       | 494 / 85,662    | 1.36 (1.19, 1.55)          | 1.16 (1.01, 1.33)    | 1.16 (1.01, 1.33)    |                    |

HR, hazard ratio; CI, confidence interval.

<sup>a</sup>Air pollution score ranges: quartile 1: (48.54, 63.35); quartile 2: (63.36, 69.95); quartile 3: (69.96, 76.43); quartile 4: (76.44, 202.00). Mean (SD) of the air pollution score is 70.63 (11.12)

<sup>b</sup>Adjusted for age and sex.

<sup>c</sup>Adjusted for age, sex, UK Biobank assessment center, household income education, smoking status, body mass index, alcohol consumption, sedentary time, physical activity duration, and healthy diet score.

<sup>d</sup>Adjusted for age, sex, UK Biobank assessment center, household income education, smoking status, body mass index, alcohol consumption, sedentary time, physical activity duration, healthy diet score, polygenic risk score, first ten genetic principal components, and genotyping batch.

**Supplemental Table S12** Association between air pollution score and incident rheumatoid arthritis among UK Biobank 342,973 participants (2,034 incident RA events), additionally adjusted the latitude of participants' residence in the sensitivity analysis.

| Air pollution score <sup>a</sup> | case / <i>n</i> | HR (95% CI) of incident RA |                      |                      | <i>P</i> for trend |
|----------------------------------|-----------------|----------------------------|----------------------|----------------------|--------------------|
|                                  |                 | Model 1 <sup>b</sup>       | Model 2 <sup>c</sup> | Model 3 <sup>d</sup> |                    |
| Per SD increment                 | -               | 1.12 (1.07, 1.16)          | 1.06 (1.01, 1.10)    | 1.06 (1.01, 1.10)    |                    |
| Quartile 1                       | 454 / 85,743    | Ref                        | Ref                  | Ref                  | 0.000053           |
| Quartile 2                       | 490 / 85,743    | 1.09 (0.96, 1.24)          | 1.00 (0.88, 1.13)    | 1.00 (0.88, 1.13)    |                    |
| Quartile 3                       | 514 / 85,743    | 1.17 (1.03, 1.33)          | 1.01 (0.89, 1.15)    | 1.01 (0.89, 1.15)    |                    |
| Quartile 4                       | 576 / 85,744    | 1.34 (1.18, 1.51)          | 1.14 (1.00, 1.29)    | 1.14 (1.01, 1.30)    |                    |

HR, hazard ratio; CI, confidence interval.

<sup>a</sup>Air pollution score ranges: quartile 1: (48.54, 63.35); quartile 2: (63.36, 69.94); quartile 3: (69.95, 76.43); quartile 4: (76.44, 202.00). Mean (SD) of the air pollution score is 70.63 (11.12).

<sup>b</sup>Adjusted for age and sex.

<sup>c</sup>Adjusted for age, sex, UK Biobank assessment center, household income education, smoking status, body mass index, alcohol consumption, sedentary time, physical activity duration, healthy diet score, and latitude of participants' residence.

<sup>d</sup>Adjusted for age, sex, UK Biobank assessment center, household income education, smoking status, body mass index, alcohol consumption, sedentary time, physical activity duration, healthy diet score, the latitude of participants' residence, polygenic risk score, first ten genetic principal components, and genotyping batch.

**Supplemental Table S13** Association between air pollution score and incident rheumatoid arthritis among UK Biobank 292,987 participants (1,745 incident RA events), after limiting participants living in the current address for at least five years in the sensitivity analysis.

| Air pollution score <sup>a</sup> | case / n     | HR (95% CI) of incident RA |                      |                      | P for trend |
|----------------------------------|--------------|----------------------------|----------------------|----------------------|-------------|
|                                  |              | Model 1 <sup>b</sup>       | Model 2 <sup>c</sup> | Model 3 <sup>e</sup> |             |
| Per SD increment                 | -            | 1.11 (1.07, 1.17)          | 1.05 (1.00, 1.10)    | 1.05 (1.00, 1.10)    |             |
| Quartile 1                       | 385 / 72,413 | Ref                        | Ref                  | Ref                  | 0.000064    |
| Quartile 2                       | 422 / 73,997 | 1.08 (0.94, 1.25)          | 1.00 (0.87, 1.15)    | 1.00 (0.87, 1.15)    |             |
| Quartile 3                       | 443 / 74,033 | 1.17 (1.02, 1.34)          | 1.01 (0.88, 1.16)    | 1.01 (0.88, 1.16)    |             |
| Quartile 4                       | 495 / 72,544 | 1.35 (1.18, 1.54)          | 1.15 (1.00, 1.32)    | 1.15 (1.00, 1.32)    |             |

HR, hazard ratio; CI, confidence interval.

<sup>a</sup>Air pollution score ranges: quartile 1: (48.54, 63.35); quartile 2: (63.36, 69.94); quartile 3: (69.95, 76.43); quartile 4: (76.44, 202.00). Mean (SD) of the air pollution score is 70.60 (11.00).

<sup>b</sup>Adjusted for age and sex.

<sup>c</sup>Adjusted for age, sex, UK Biobank assessment center, household income education, smoking status, body mass index, alcohol consumption, sedentary time, physical activity duration, and healthy diet score.

<sup>d</sup>Adjusted for age, sex, UK Biobank assessment center, household income education, smoking status, body mass index, alcohol consumption, sedentary time, physical activity duration, healthy diet score, polygenic risk score, first ten genetic principal components, and genotyping batch.

**Supplemental Table S14** Association between air pollution score and incident rheumatoid arthritis among UK Biobank 313,466 participants (1,701 incident RA events), after excluding participants who used NSAIDs previously or at baseline in the sensitivity analysis.

| Air pollution score <sup>a</sup> | case / n     | HR (95% CI) of incident RA |                      |                      | P for trend |
|----------------------------------|--------------|----------------------------|----------------------|----------------------|-------------|
|                                  |              | Model 1 <sup>b</sup>       | Model 2 <sup>c</sup> | Model 3 <sup>e</sup> |             |
| Per SD increment                 | -            | 1.11 (1.06, 1.16)          | 1.05 (1.01, 1.10)    | 1.05 (1.00, 1.10)    |             |
| Quartile 1                       | 390 / 77,733 | Ref                        | Ref                  | Ref                  | 0.024       |
| Quartile 2                       | 406 / 78,046 | 1.09 (0.96, 1.23)          | 1.00 (0.88, 1.14)    | 1.00 (0.88, 1.14)    |             |
| Quartile 3                       | 425 / 78,410 | 1.16 (1.02, 1.32)          | 1.01 (0.89, 1.15)    | 1.01 (0.89, 1.15)    |             |
| Quartile 4                       | 480 / 79,157 | 1.32 (1.16, 1.49)          | 1.13 (1.00, 1.28)    | 1.13 (1.00, 1.28)    |             |

HR, hazard ratio; CI, confidence interval.

<sup>a</sup>Air pollution score ranges: quartile 1: (48.62, 63.35); quartile 2: (63.36, 69.95); quartile 3: (69.96, 76.43); quartile 4: (76.44, 202.00). Mean (SD) of the air pollution score is 70.71 (11.15).

<sup>b</sup>Adjusted for age and sex.

<sup>c</sup>Adjusted for age, sex, UK Biobank assessment center, household income education, smoking status, body mass index, alcohol consumption, sedentary time, physical activity duration, and healthy diet score.

<sup>d</sup>Adjusted for age, sex, UK Biobank assessment center, household income education, smoking status, body mass index, alcohol consumption, sedentary time, physical activity duration, healthy diet score, polygenic risk score, first ten genetic principal components, and genotyping batch.

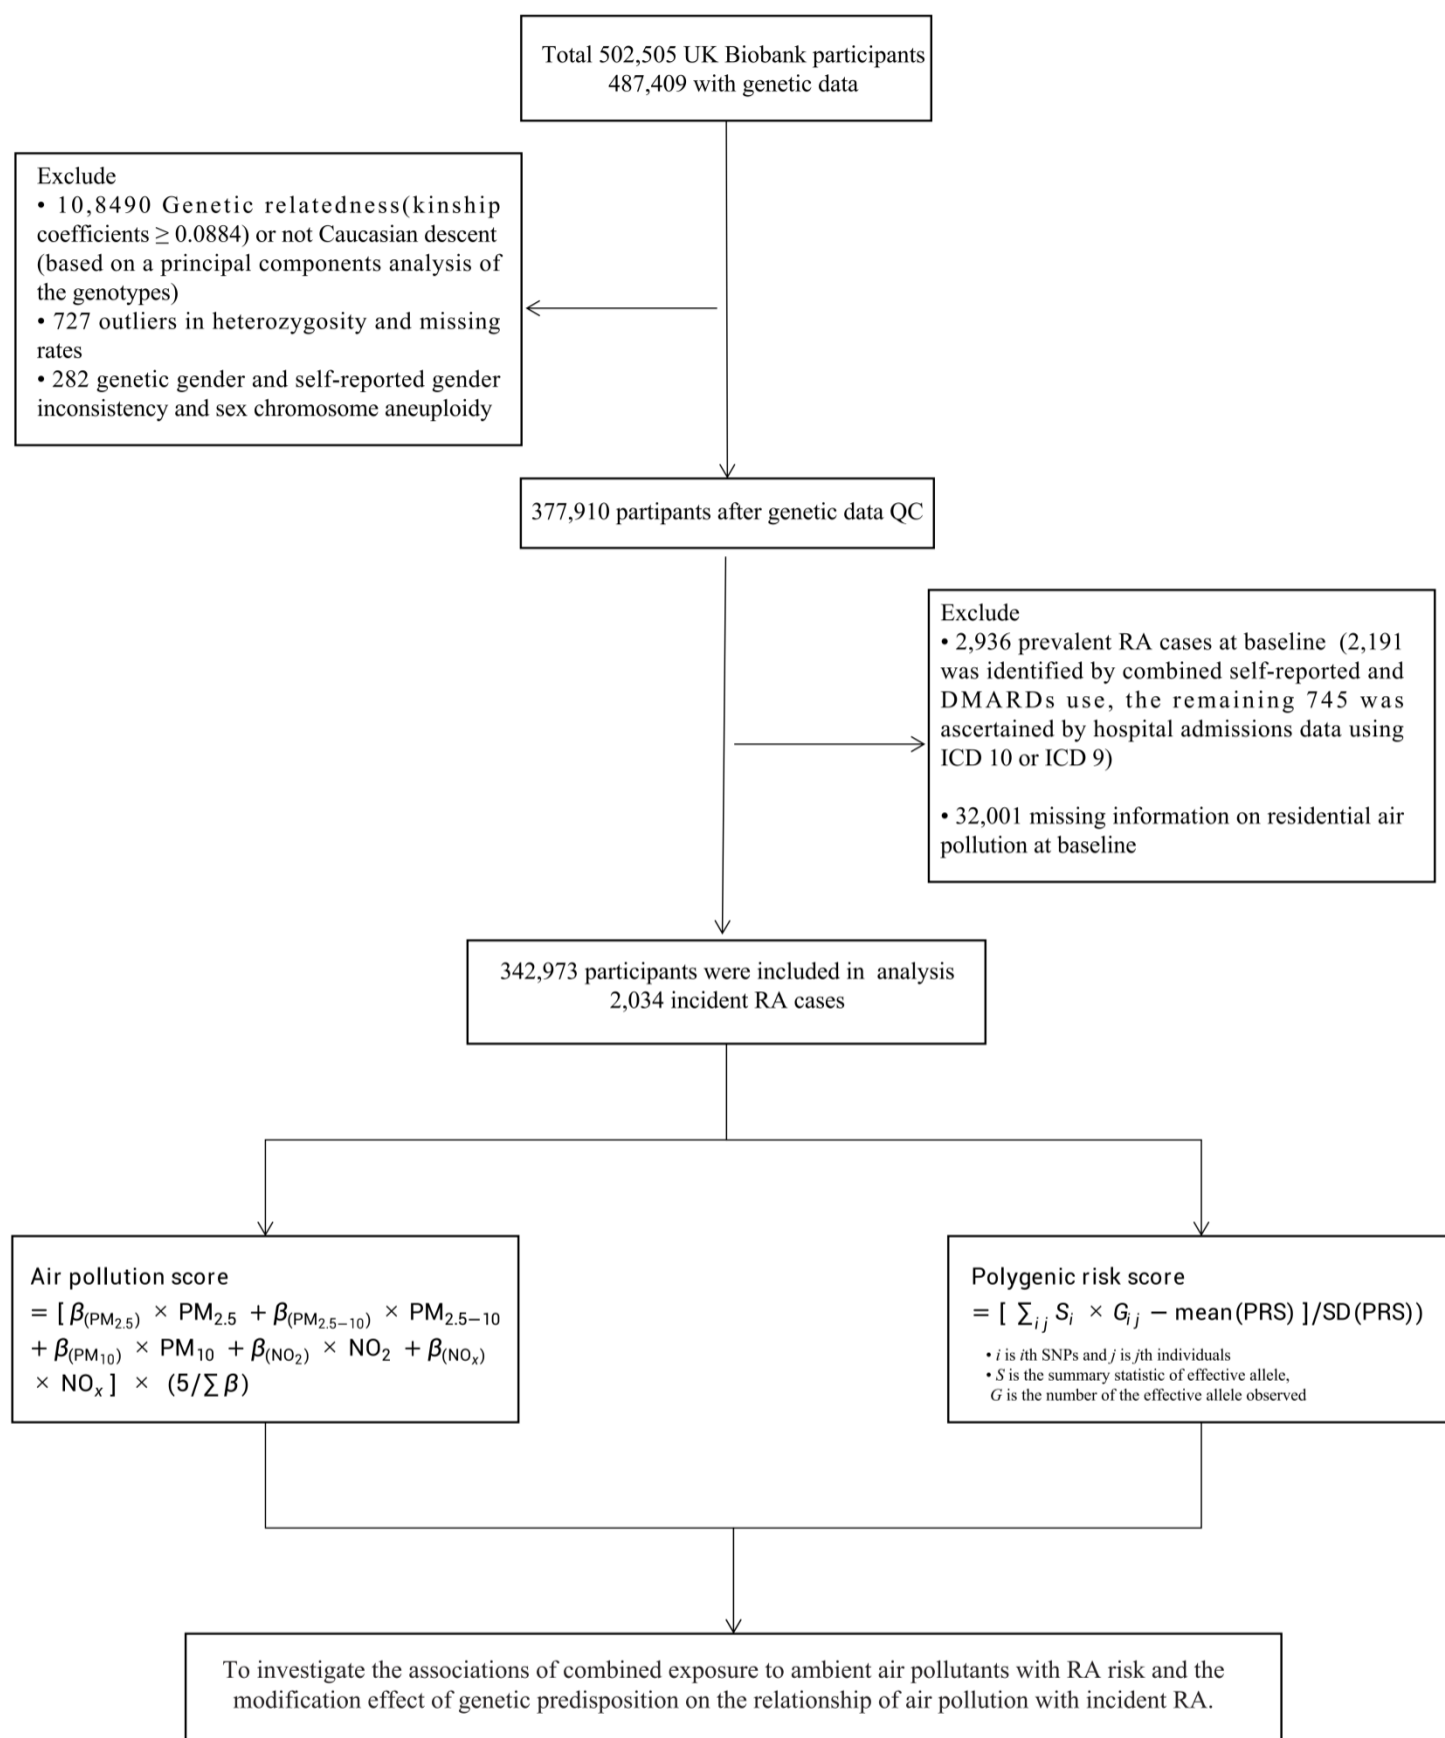

**Supplemental Figure S1** Overview of design and population selection in the UK Biobank study of the association of air pollution and genetic risk with rheumatoid arthritis incidence.

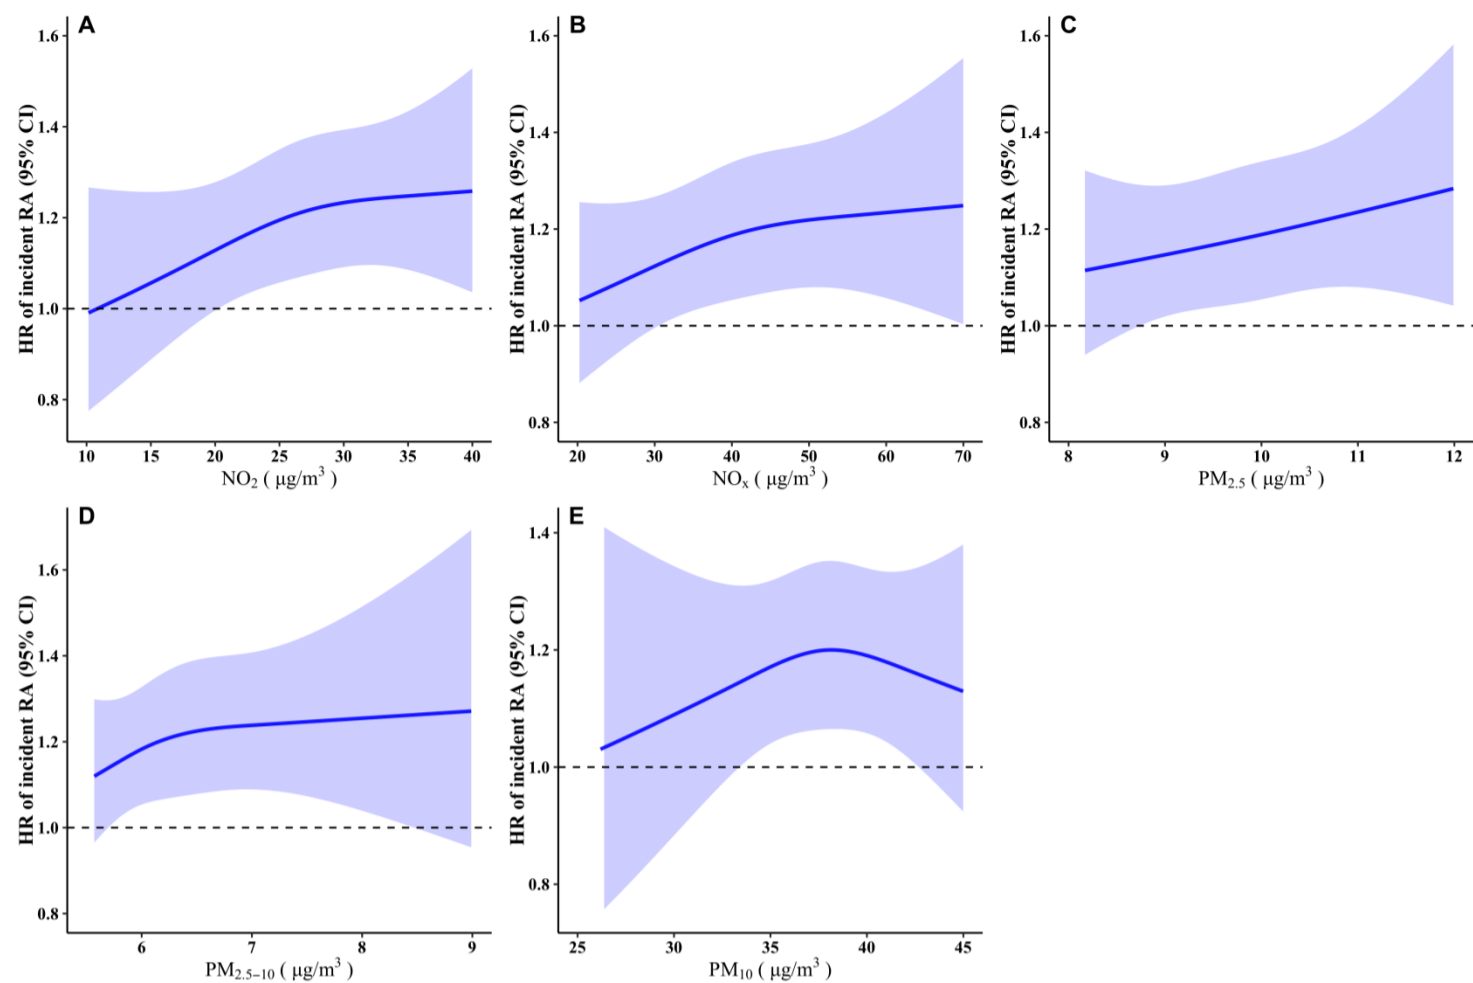

**Supplemental Figure S2** Exposure-response relationships of each air pollutant with incident rheumatoid arthritis among UK Biobank 342,973 participants (2,034 incident RA events).

The exposure-response relationship of concentrations for each air pollutants with hazard ratios for incident RA was assessed using restricted cubic spline analysis with 3 knots. The source data used to generate the figure was in Excel Table S2

(A)NO<sub>2</sub> (B)NO<sub>x</sub> (C)PM<sub>2.5</sub> (D)PM<sub>2.5-10</sub> (E)PM<sub>10</sub> ; Both were adjusted for age, sex, UK Biobank assessment center, household income education, smoking status, body mass index, alcohol consumption, sedentary time, physical activity duration, healthy diet score, polygenic risk score, first ten genetic principal components and genotyping batch.

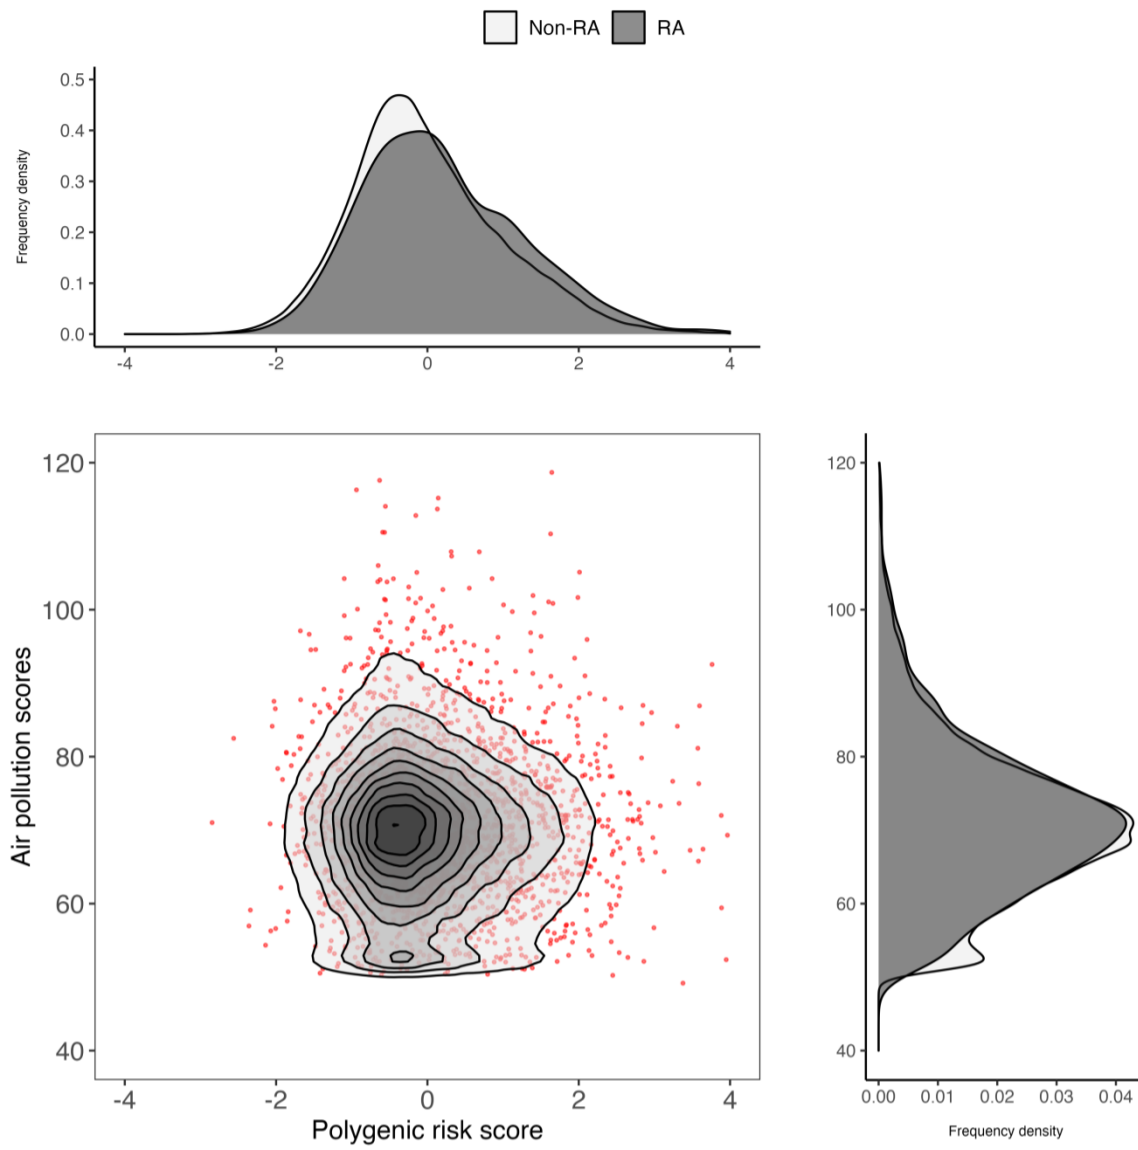

**Supplemental Figure S3** Joint distribution of air pollution scores and polygenic risk scores between RA and non-RA among UK Biobank 342,973 participants (2,034 incident RA events).

The marginal density plot represents the distribution of air pollution score and polygenic risk score according to incident RA status. The ridge density plot represents the 95% range for the bivariate distribution. Incident RA (red points) are also shown. The source data used to generate the figure was in Excel Table S3

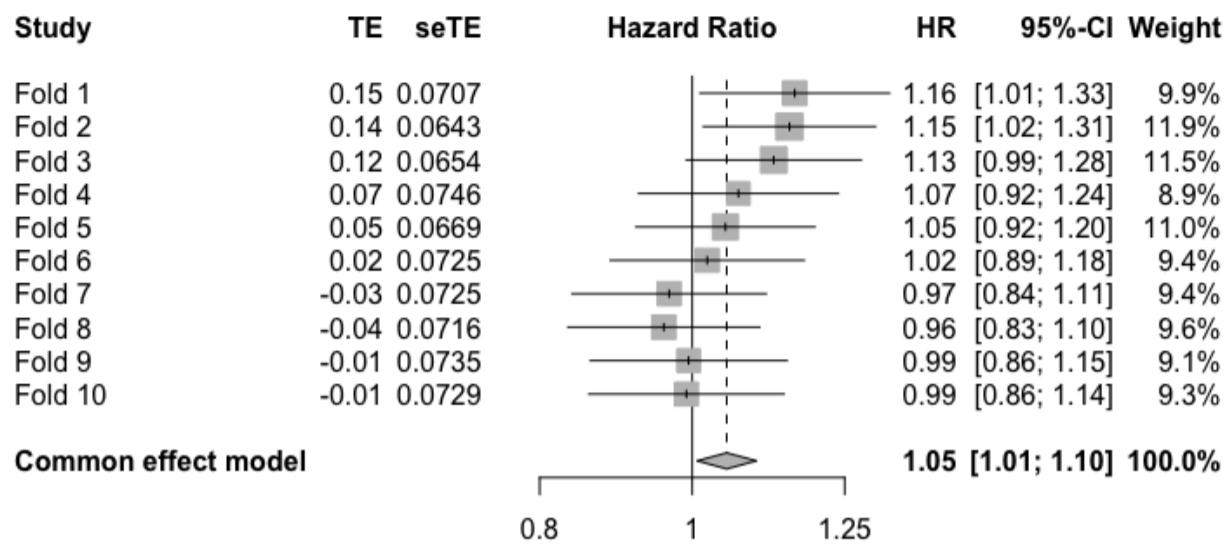

**Supplemental Figure S4** Validation of association between air pollution score and incident rheumatoid arthritis by 10-fold cross-validation.

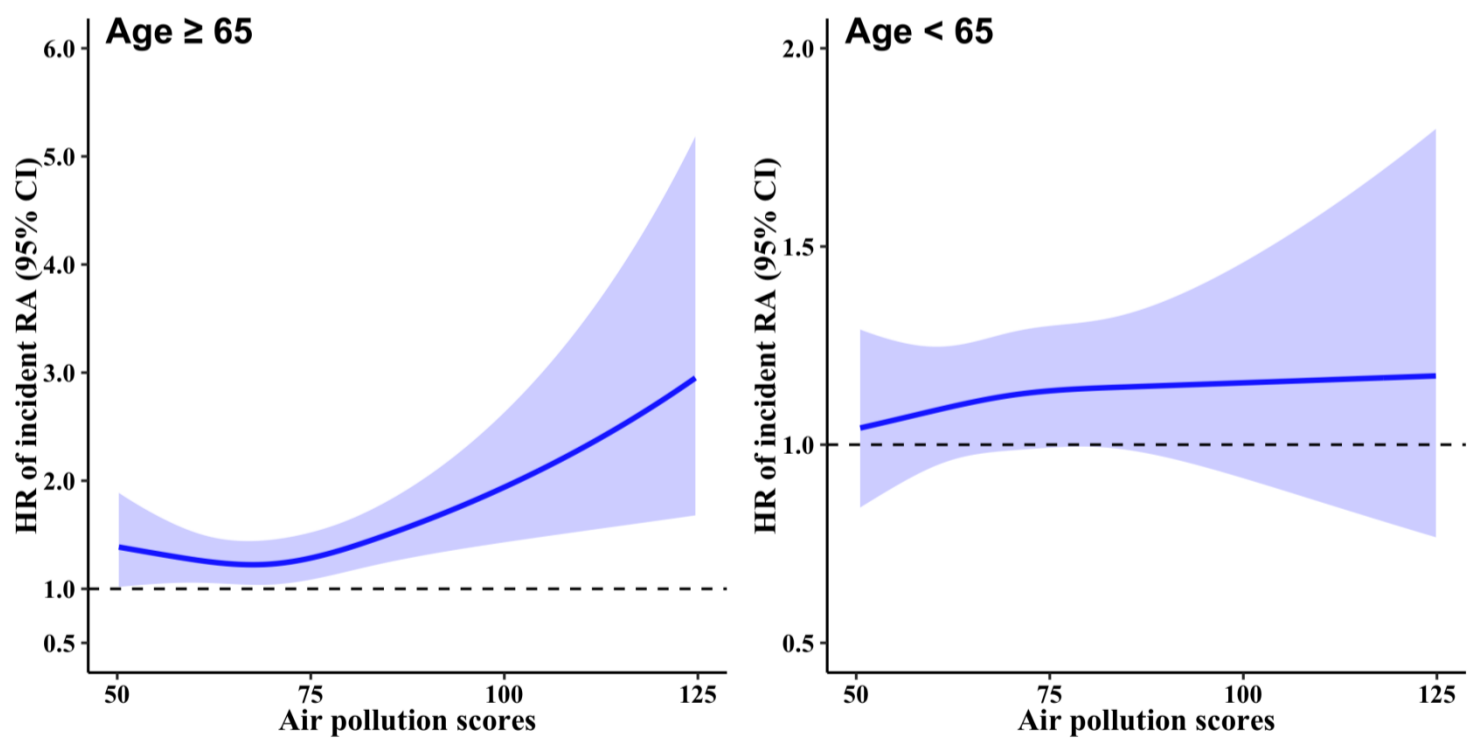

**Supplemental Figure S5** Exposure-response relationship of air pollution score with incident rheumatoid arthritis according to age. HR, hazard ratio; CI, confidence interval; RA, rheumatoid arthritis.

The exposure-response relationship of air pollution scores with hazard ratios for incident RA was assessed using restricted cubic spline analysis with 3 knots. The source data used to generate the figure was in Excel Table S4.

Both were adjusted for age, sex, UK Biobank assessment center, household income education, smoking status, body mass index, alcohol consumption, sedentary time, physical activity duration, healthy diet score, polygenic risk score, first ten genetic principal components and genotyping batch.

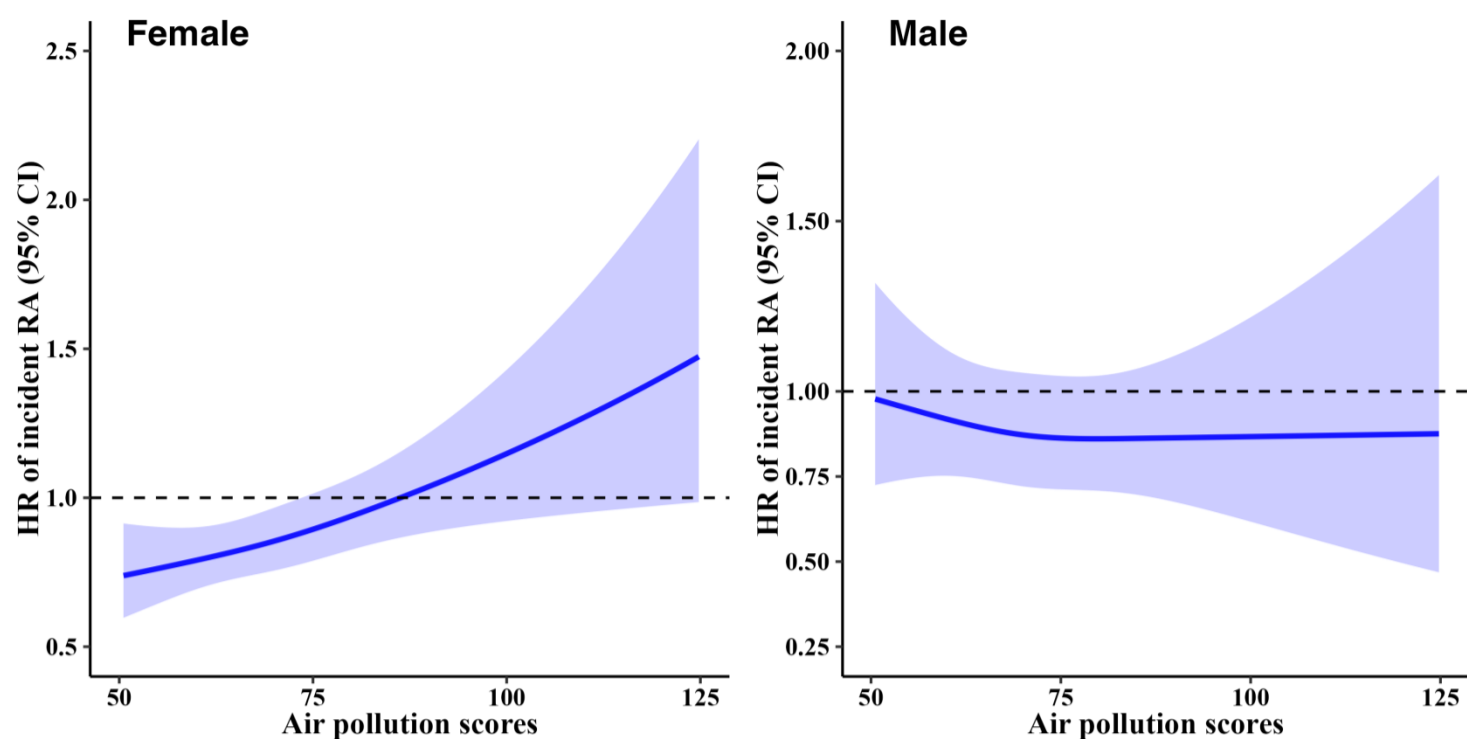

**Supplemental Figure S6** Exposure-response relationship of air pollution score with incident rheumatoid arthritis according to sex. HR, hazard ratio; CI, confidence interval; RA, rheumatoid arthritis.

The exposure-response relationship of air pollution scores with hazard ratios for incident RA was assessed using restricted cubic spline analysis with 3 knots. The source data used to generate the figure was in Excel Table S5.

Both were adjusted for age, UK Biobank assessment center, household income education, smoking status, body mass index, alcohol consumption, sedentary time, physical activity duration, healthy diet score, polygenic risk score, first ten genetic principal components, and genotyping batch. Additionally adjusted for menopause and hormone replacement therapy in the female subgroup.

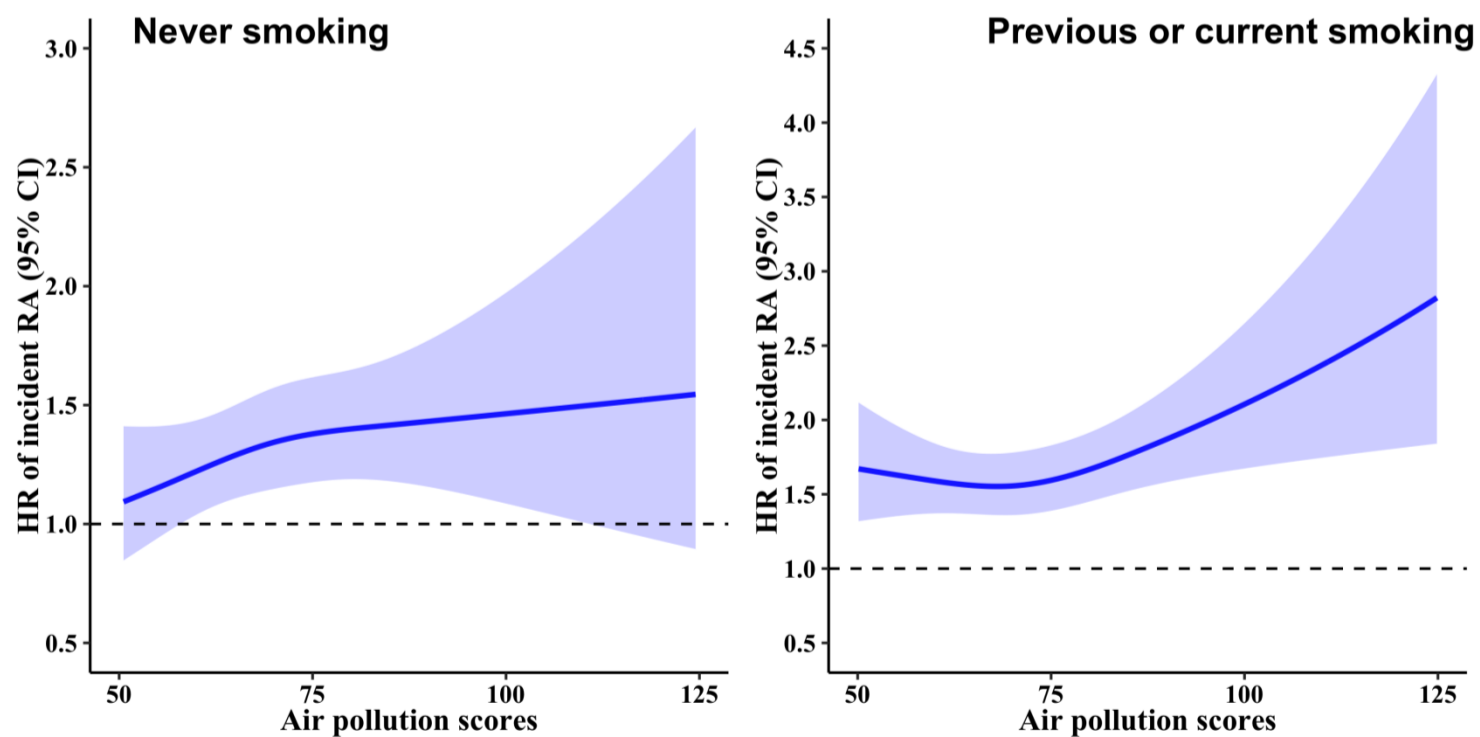

**Supplemental Figure S7** Exposure-response relationship of air pollution score with incident rheumatoid arthritis according to smoking status.

HR, hazard ratio; CI, confidence interval; RA, rheumatoid arthritis.

The exposure-response relationship of air pollution scores with hazard ratios for incident RA was assessed using restricted cubic spline analysis with 3 knots. The source data used to generate the figure was in Excel Table S6.

Both were adjusted for age, sex, UK Biobank assessment center, household income education, body mass index, alcohol consumption, sedentary time, physical activity duration, healthy diet score, polygenic risk score, first ten genetic principal components and genotyping batch.



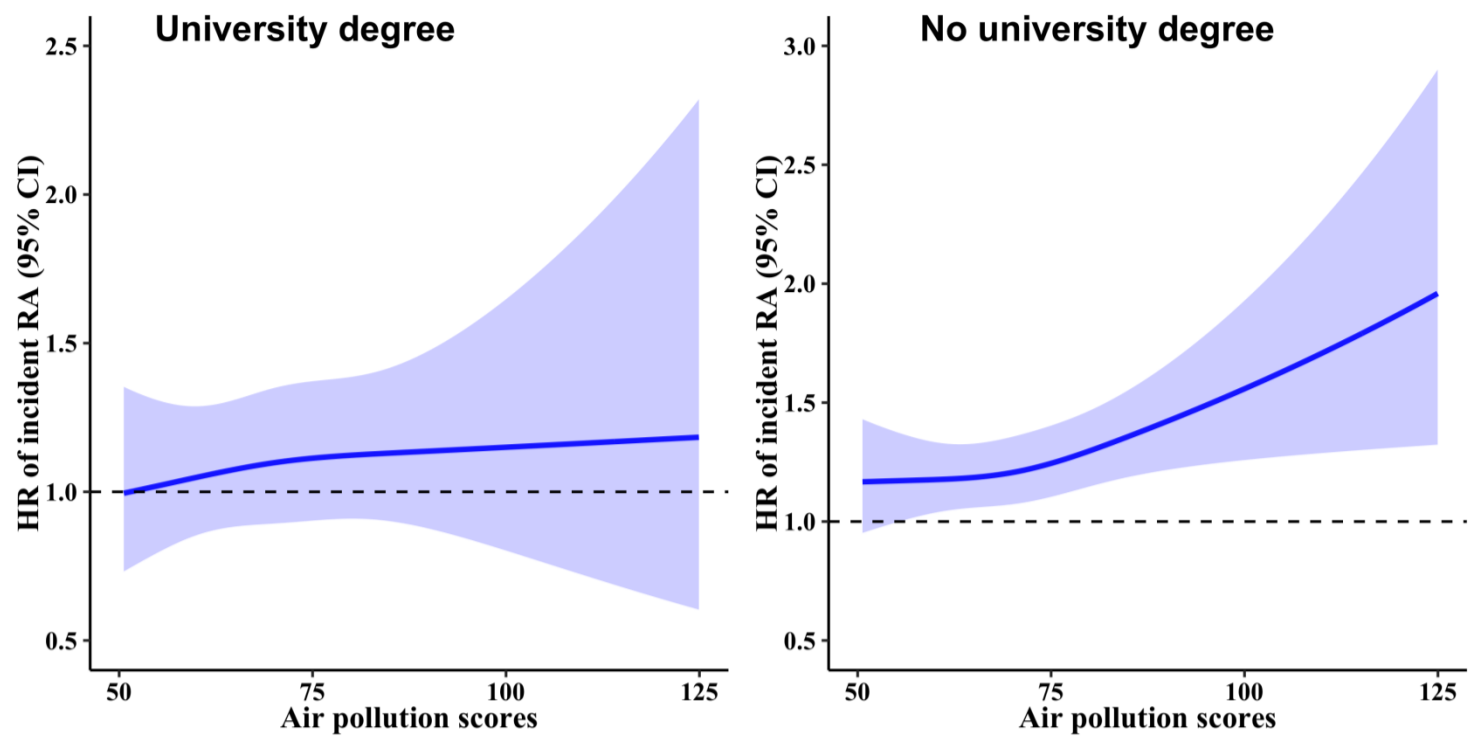

**Supplemental Figure S8** Exposure-response relationship of air pollution score with incident rheumatoid arthritis according to education level.

HR, hazard ratio; CI, confidence interval; RA, rheumatoid arthritis.

The exposure-response relationship of air pollution scores with hazard ratios for incident RA was assessed using restricted cubic spline analysis with 3 knots. The source data used to generate the figure was in Excel Table S7.

Both were adjusted for age, sex, UK Biobank assessment center, household income, smoking status, body mass index, alcohol consumption, sedentary time, physical activity duration, healthy diet score, polygenic risk score, first ten genetic principal components, and genotyping batch.

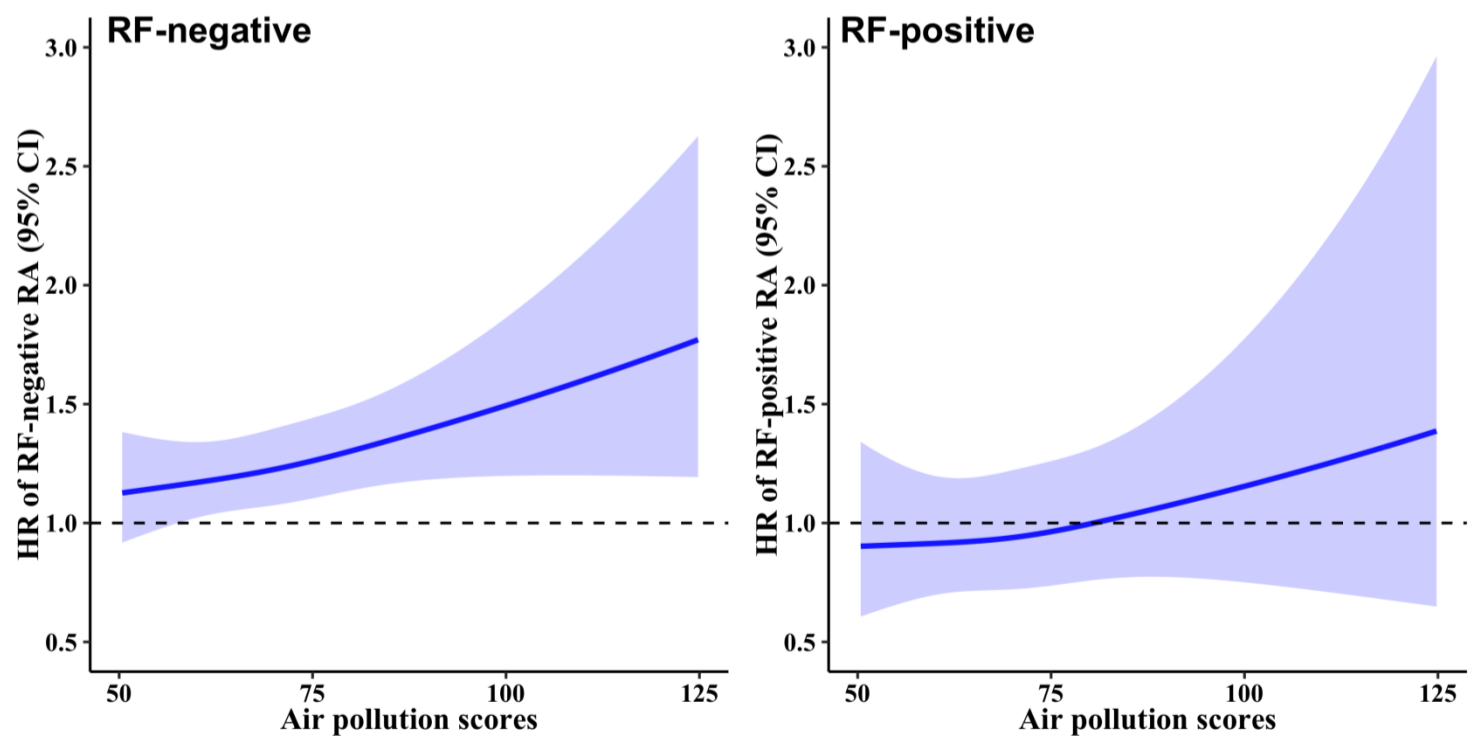

**Supplemental Figure S9** Exposure-response relationship of air pollution score with rheumatoid arthritis incidence according to rheumatoid factor (RF) status.

HR, hazard ratio; CI, confidence interval; RA, rheumatoid arthritis.

The exposure-response relationship of air pollution scores with hazard ratios for incident RA was assessed using restricted cubic spline analysis with 3 knots. The source data used to generate the figure was in Excel Table S8.

Both were adjusted for age, sex, UK Biobank assessment center, household income education, smoking status, body mass index, alcohol consumption, sedentary time, physical activity duration, healthy diet score, polygenic risk score, first ten genetic principal components and genotyping batch.
