# Supplementary material
Source: PubMed Central journal article supplement (PMC10010395)
Supplement: ehp10710.smcontents.508.pdf [file ehp10710.smcontents.508.pdf]

**Note to readers with disabilities:** *EHP* strives to ensure that all journal content is accessible to all readers. However, some figures and Supplemental Material published in *EHP* articles may not conform to [508 standards](#) due to the complexity of the information being presented. If you need assistance accessing journal content, please contact [ehp508@niehs.nih.gov](mailto:ehp508@niehs.nih.gov). Our staff will work with you to assess and meet your accessibility needs within 3 working days.

### **Supplemental Material**

#### **Association of Combined Exposure to Ambient Air Pollutants, Genetic Risk, and Incident Rheumatoid Arthritis: A Prospective Cohort Study in the UK Biobank**

Jie Zhang, Xin-Yu Fang, Jun Wu, Yin-Guang Fan, Rui-Xue Leng, Bo Liu, Xiao-Jie Lv, Yu-Lu Yan, Chen Mao, and Dong-Qing Ye

#### **Table of Contents**

**Table S1.** Source and corresponding code to identify rheumatoid arthritis cases and relevant prescription medication in the UK Biobank study.

**Table S2.** Components of healthy diet score and alcohol consumption in the UK Biobank study.

**Table S3.** A comparison of baseline characteristics between the current study population (342,973 participants) and the full UK Biobank cohort (502,505 participants).

**Table S4.** Spearman correlations between the individual air pollutant incorporated in the air pollution score.

**Table S5.** Weights of each air pollutant included in the calculation of air pollution score in the main analysis.

**Table S6.** Comparison of contribution proportion of individual air pollutant to total effect among weighted air pollution score, quantile g-computation, and Bayesian kernel machine regression in the sensitivity analysis.

**Table S7.** Comparison of the total effect of the mixture of air pollutants among weighted air pollution score, quantile g-computation, and Bayesian kernel machine regression in the sensitivity analysis.

**Table S8.** Association between air pollution score and RA risk in different subgroups, and interaction analysis, according to age, sex, education level, smoking status, and rheumatoid factor status.

**Table S9.** Association between air pollution score (eliminating PM<sub>2.5-10</sub> and PM<sub>10</sub>) and incident rheumatoid arthritis among UK Biobank 342,973 participants (2,034 incident RA events) in the sensitivity analysis.

**Table S10.** Association between air pollution score (including PM<sub>2.5</sub> absorbance) and incident rheumatoid arthritis among UK Biobank 342,973 participants (2,034 incident RA events) in the sensitivity analysis.

**Table S11.** Association between air pollution score and incident rheumatoid arthritis among UK Biobank 342,691 participants (1,752 incident RA events), after excluding participants with a follow-up time of fewer than 2 years in the sensitivity analysis.

**Table S12.** Association between air pollution score and incident rheumatoid arthritis among UK Biobank 342,973 participants (2,034 incident RA events), additionally adjusted the latitude of participants' residence in the sensitivity analysis.

**Table S13.** Association between air pollution score and incident rheumatoid arthritis among UK Biobank 292,987 participants (1,745 incident RA events), after limiting participants living in the current address for at least five years in the sensitivity analysis.

**Table S14.** Association between air pollution score and incident rheumatoid arthritis among UK Biobank 313,466 participants (1,701 incident RA events), after excluding participants who used NSAIDs previously or at baseline in the sensitivity analysis.

**Figure S1.** Overview of design and population selection in the UK Biobank study of the association of air pollution and genetic risk with rheumatoid arthritis incidence.

**Figure S2.** Exposure-response relationships of each air pollutant with incident rheumatoid arthritis among UK Biobank 342,973 participants (2,034 incident RA events).

**Figure S3.** Joint distribution of air pollution scores and polygenic risk scores between RA and non-RA among UK Biobank 342,973 participants (2,034 incident RA events).

**Figure S4.** Validation of association between air pollution score and incident rheumatoid arthritis by 10-fold cross-validation.

**Figure S5.** Exposure-response relationship of air pollution score with incident rheumatoid arthritis according to age.

**Figure S6.** Exposure-response relationship of air pollution score with incident rheumatoid arthritis according to sex.

**Figure S7.** Exposure-response relationship of air pollution score with incident rheumatoid arthritis according to smoking status.

**Figure S8.** Exposure-response relationship of air pollution score with incident rheumatoid arthritis according to education level.

**Figure S9.** Exposure-response relationship of air pollution score with rheumatoid arthritis incidence according to rheumatoid factor (RF) status.

**Additional File-** Excel Document
